# Supplementary material for: Improving Spatial Disaggregation of Crop Yield by Incorporating Machine Learning with Multisource Data: A Case Study of Chinese Maize Yield
Source: MDPI journal article supplement (doi:10.3390/rs14102340), 2022-05-12
Supplement: s1 [file s1]

## Supplementary materials

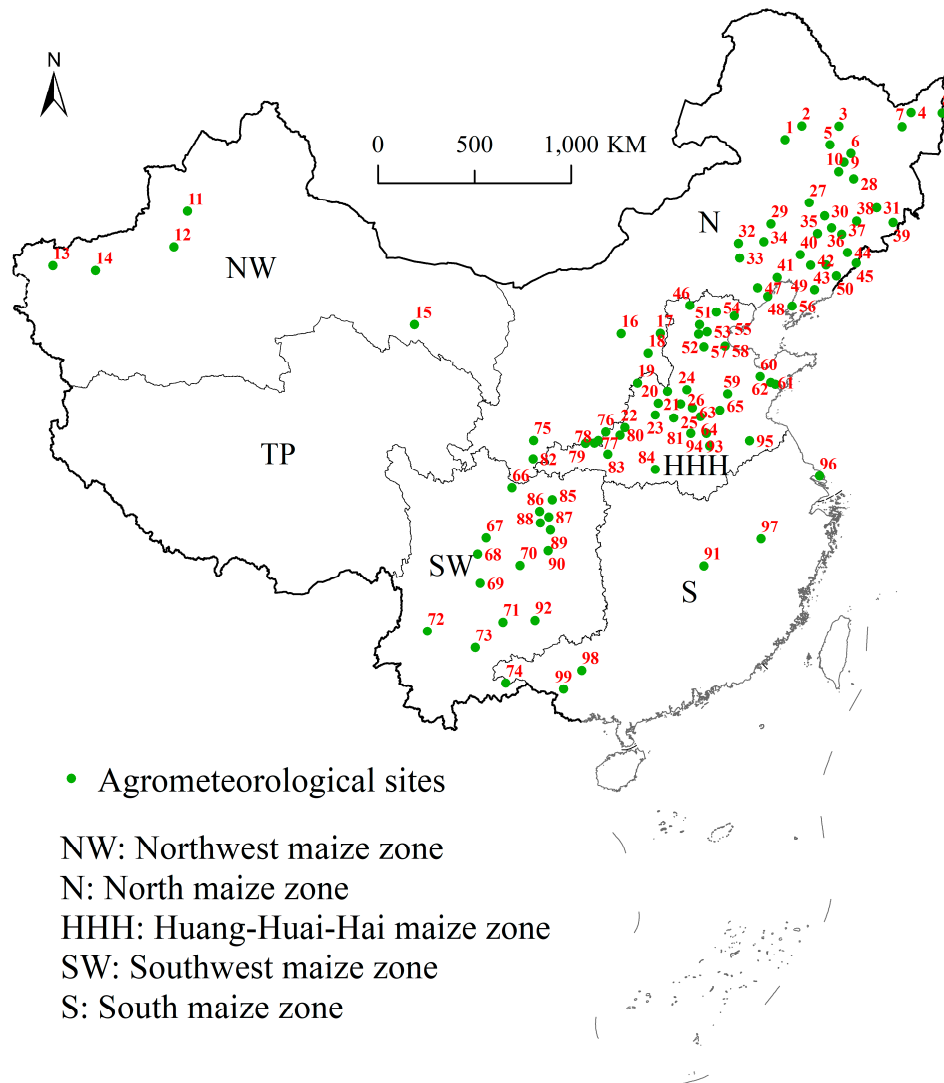

**Figure. S1.** The spatial distribution of agricultural meteorological stations. (North (N) spring maize zone; Huang-Huai-Hai (HHH) summer maize zone; Southwest (SW) maize zone; South (S) maize zone; Northwest (NW) maize zone).

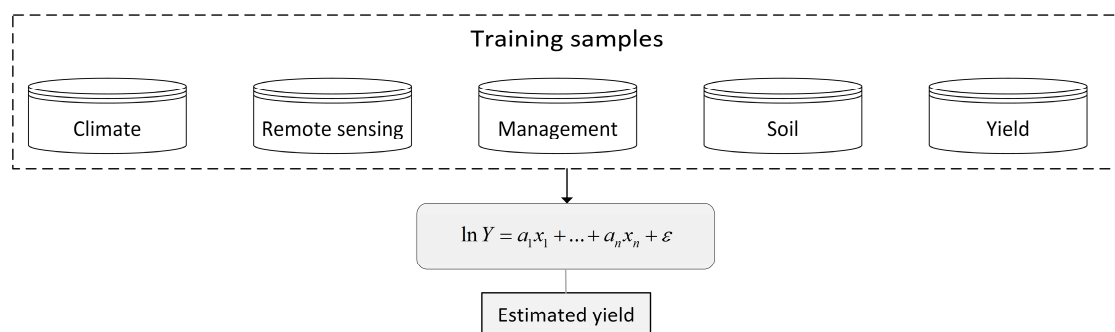

**Figure. S2.** Flow chart of MLR. Here,  $Y$  is the maize yield,  $x_1, \dots, x_n$  is the predictors, and  $a_1, \dots, a_n$  is the parameters to be fit.

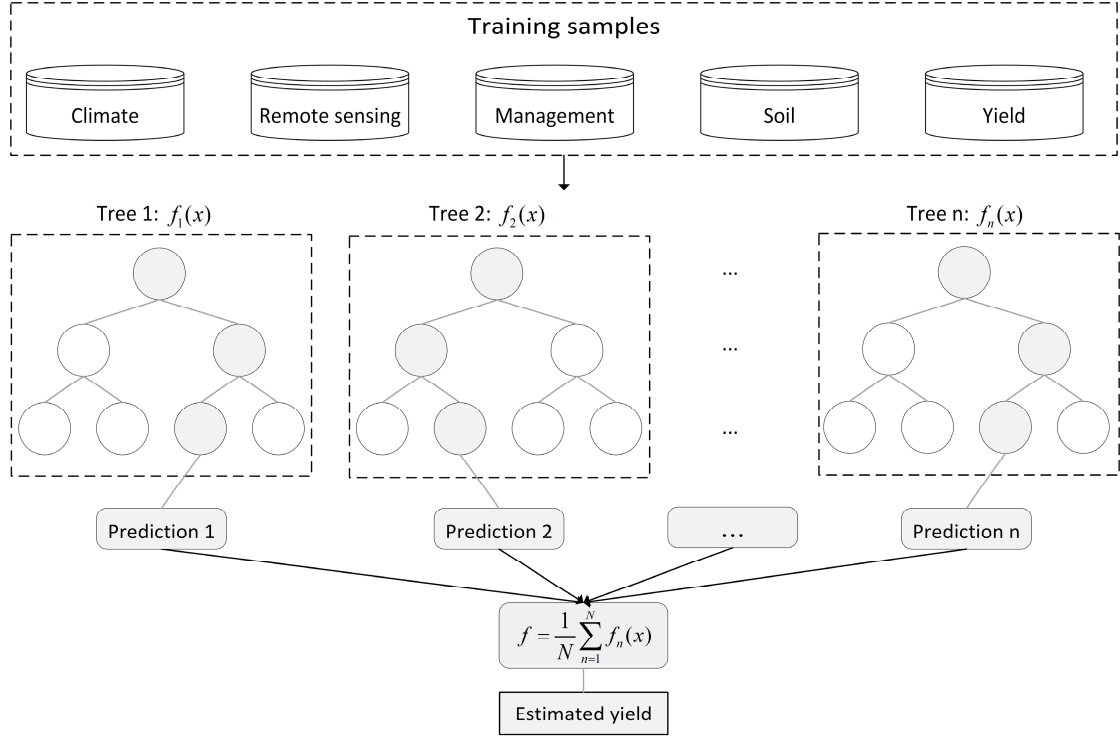

**Figure. S3.** Flow chart of RF. Here,  $N$  is the number of trees,  $x$  is the predictors, and  $f()$  is the regression tree.

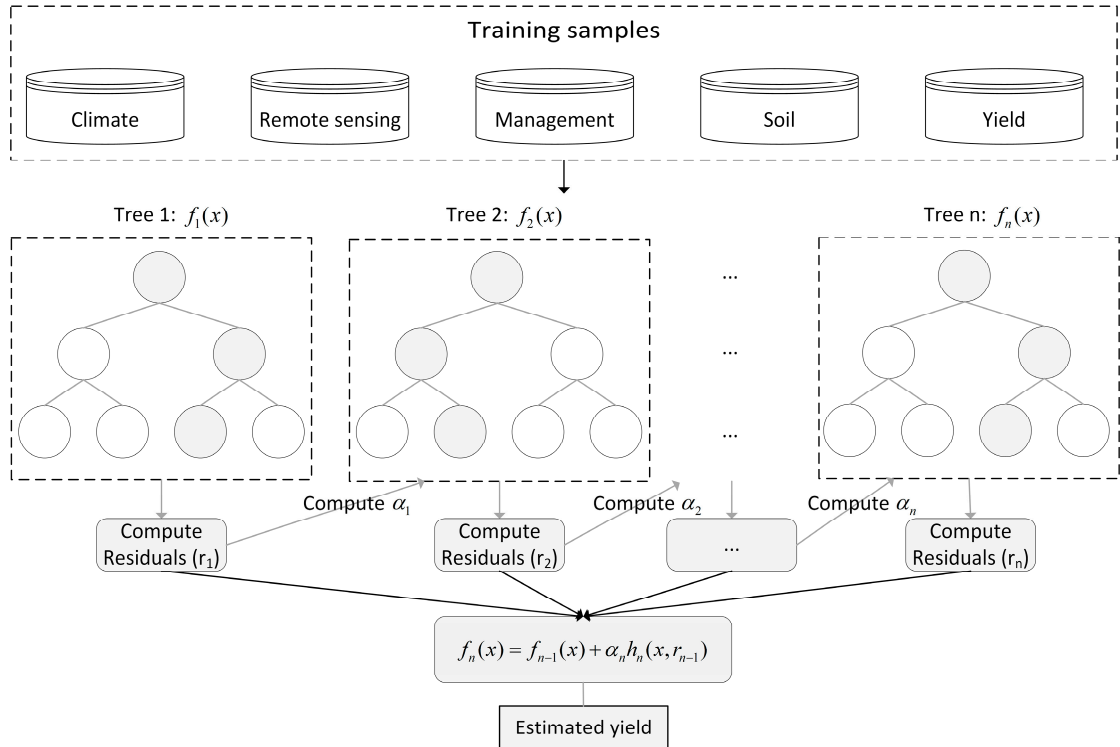

**Figure. S4.** Flow chart of XGB. Here,  $\alpha$  is the regularization parameter,  $r$  is the residual,  $f()$  is the regression tree, and  $h()$  is the function trained to predict the residual.

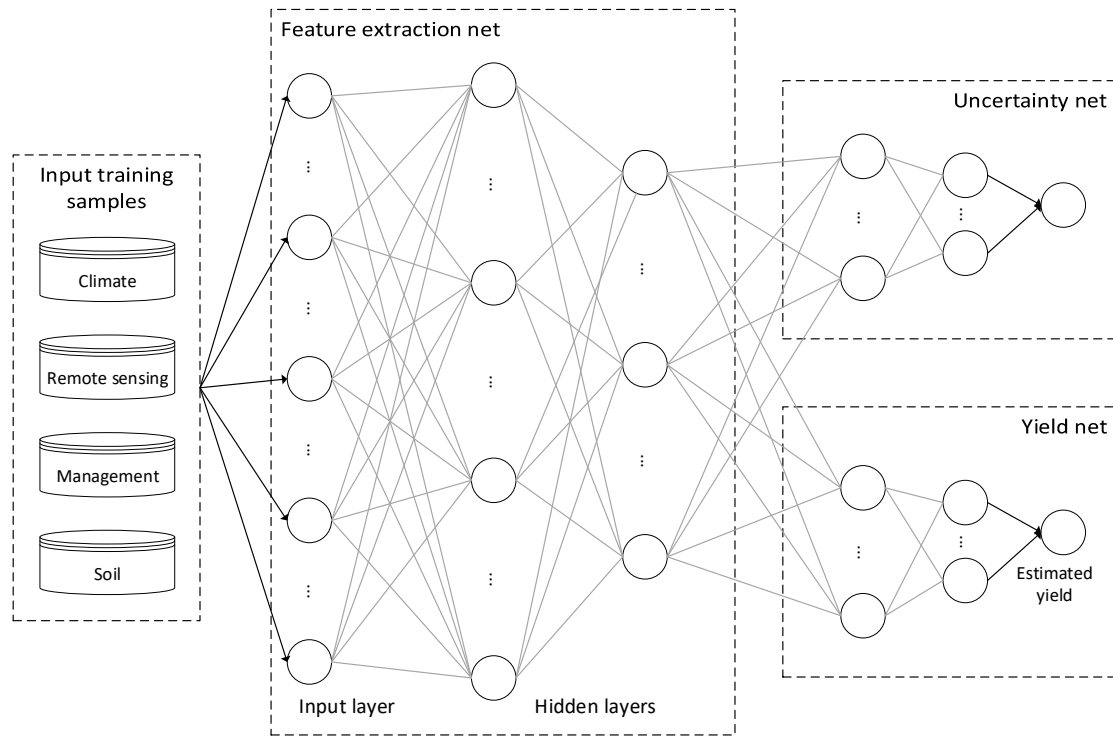

**Figure. S5.** The architecture of the BNN used in this study

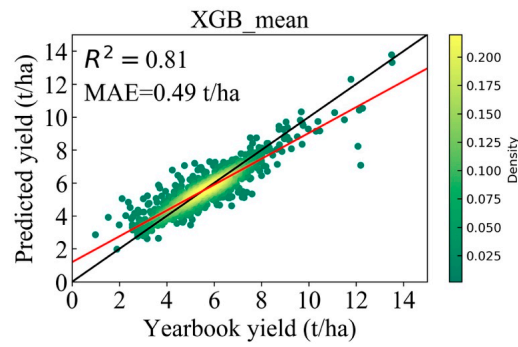

**Figure. S6.** Scatter plots between estimated and statistical yields at the prefecture-scale for the test set. Black and red solid lines show 1:1 and regression lines, respectively.

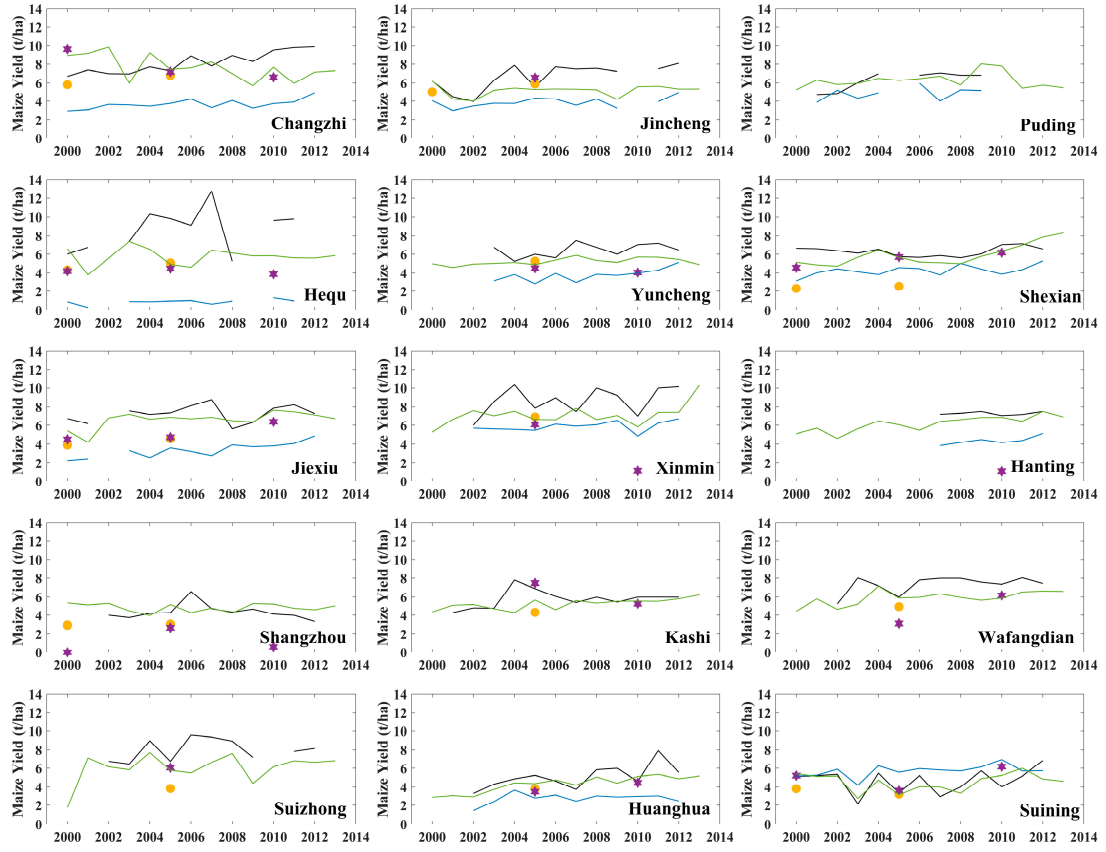

Figure. S7. Yield times series in the selected locations for different datasets.

Table S1 Default parameters of XGB and RF

| Model | Parameters        | Default values |
|-------|-------------------|----------------|
| XGB   | learning_rate     | 0.3            |
|       | n_estimators      | 100            |
|       | max_depth         | 6              |
|       | min_child_weight  | 1              |
|       | gamma             | 0              |
|       | n_estimators      | 10             |
| RF    | max_depth         | None           |
|       | min_samples_split | 2              |
|       | min_samples_leaf  | 1              |
|       | max_features      | auto           |

**Table S2** The RMSE and R2 between different datasets and site records.

| Number | Name        | Longitude | Latitude | RMSE (t/ha) |      |            |      |            |           | R <sup>2</sup> |      |
|--------|-------------|-----------|----------|-------------|------|------------|------|------------|-----------|----------------|------|
|        |             |           |          | Our result  | GDHY | Our result | SPAM | Our result | earthstat | Our result     | GDHY |
| 1      | Longjiang   | 123.18    | 47.33    | 3.45        | 2.87 | 3.74       | 5.31 | 3.74       |           | 0.59           | 0.08 |
| 2      | Fuyu        | 124.48    | 47.8     | 2.84        | 3.16 | 1.70       | 1.41 | 1.68       | 0.23      | 0.23           | 0.04 |
| 3      | Hailun      | 126.97    | 47.43    | 1.32        | 1.03 | 1.43       | 1.62 | 1.43       |           | 0.40           | 0.46 |
| 4      | Fujin       | 131.98    | 47.23    | 4.03        | 4.93 | 2.39       | 1.84 | 2.39       |           | 0.48           | 0.16 |
| 5      | Qinggang    | 126.1     | 46.68    | 1.95        | 2.06 | 0.78       | 0.35 | 0.78       |           | 0.42           | 0.63 |
| 6      | Bayan       | 127.35    | 46.08    | 2.39        | 2.79 | 1.65       | 2.01 | 1.65       |           | 0.24           | 0.31 |
| 7      | Jixian      | 131.13    | 46.71    | 3.62        | 3.29 | 3.01       | 3.76 | 3.01       |           | 0.67           | 0.40 |
| 8      | Raohe       | 134       | 46.8     | 1.37        | 3.49 | 1.16       | 7.11 | 1.16       |           | 0.06           | 0.56 |
| 9      | Haerbin     | 126.77    | 45.75    | 1.84        | 2.24 | 1.36       | 4.27 | 1.36       |           | 0.24           | 0.10 |
| 10     | Shuangcheng | 126.3     | 45.38    | 2.02        | 2.39 | 1.68       | 1.31 | 1.68       |           | 0.48           | 0.65 |
| 11     | Xinyuan     | 83.3      | 43.45    | 3.61        |      | 3.58       | 2.00 | 1.22       | 1.69      | 0.18           |      |
| 12     | Kuche       | 82.95     | 41.72    | 1.23        |      | 1.45       | 0.80 | 1.90       | 1.17      | 0.30           |      |
| 13     | Kashi       | 75.98     | 39.47    | 1.22        |      | 0.92       | 0.66 | 0.92       |           | 0.02           |      |
| 14     | Bachu       | 78.57     | 39.8     | 1.18        |      | 0.08       | 6.63 | 0.08       |           | 0.38           |      |
| 15     | Jiuquan     | 98.48     | 39.77    | 2.59        |      | 1.67       | 9.68 | 1.29       | 1.86      | 0.26           |      |
| 16     | Hequ        | 111.15    | 39.38    | 3.75        | 8.10 | 3.60       | 4.66 | 4.39       | 3.58      | 0.00           | 0.01 |
| 17     | Fanzhi      | 113.53    | 39.26    | 3.73        | 3.60 | 2.17       | 3.75 | 2.16       | 2.88      | 0.40           | 0.48 |
| 18     | Xinzhou     | 112.7     | 38.41    | 4.06        | 4.08 | 2.68       | 1.24 | 2.06       | 2.62      | 0.15           | 0.23 |
| 19     | Jiexiu      | 111.93    | 37.05    | 1.06        | 4.03 | 0.81       | 2.16 | 0.38       | 2.78      | 0.36           | 0.00 |
| 20     | Changzhi    | 113.06    | 36.05    | 2.11        | 4.55 | 1.68       | 2.38 | 1.32       | 0.72      | 0.23           | 0.51 |

|    |             |        |       |      |       |      |      |      |      |      |      |
|----|-------------|--------|-------|------|-------|------|------|------|------|------|------|
| 21 | Shexian     | 113.66 | 36.56 | 0.95 | 2.20  | 0.96 | 1.29 | 0.52 | 3.81 | 0.26 | 0.11 |
| 22 | Yuncheng    | 111.02 | 35.03 | 1.21 | 2.84  | 1.23 | 2.36 | 1.23 |      | 0.49 | 0.00 |
| 23 | Jincheng    | 112.83 | 35.51 | 1.91 | 3.01  | 0.24 | 0.96 | 0.34 | 0.86 | 0.29 | 0.25 |
| 24 | Feixiang    | 114.8  | 36.55 | 0.75 | 1.24  | 1.15 | 1.42 | 1.15 |      | 0.50 | 0.20 |
| 25 | Xinxiang    | 113.88 | 35.31 | 1.03 | 1.40  | 0.58 | 0.16 | 0.58 |      | 0.11 | 0.24 |
| 26 | Tangyin     | 114.35 | 35.93 | 2.28 | 2.88  | 1.90 | 3.64 | 1.90 |      | 0.03 | 0.08 |
| 27 | Changling   | 123.97 | 44.25 | 2.32 | 6.37  | 2.60 | 2.80 | 2.91 |      | 0.39 | 0.70 |
| 28 | Wuchang     | 127.15 | 44.9  | 3.19 | 2.64  | 1.25 | 7.97 | 1.25 |      | 0.02 | 0.12 |
| 29 | Kailuxian   | 121.28 | 43.6  | 4.00 | 7.13  | 5.03 | 2.01 | 5.21 | 3.13 | 0.08 | 0.29 |
| 30 | Gongzhuling | 124.8  | 43.52 | 3.46 | 4.54  | 2.28 | 2.30 | 2.78 | 2.70 | 0.29 | 0.22 |
| 31 | Dunhua      | 128.2  | 43.37 | 3.04 | 2.41  | 2.80 | 2.44 | 2.87 | 2.20 | 0.10 | 0.15 |
| 32 | Wengniuteqi | 119.03 | 42.95 | 4.78 | 9.89  | 5.19 | 4.90 | 3.75 | 3.16 | 0.25 | 0.37 |
| 33 | Chifeng     | 118.97 | 42.27 | 5.57 | 7.42  | 5.54 | 1.93 | 4.36 | 2.82 | 0.18 | 0.25 |
| 34 | Naimanqi    | 120.65 | 42.85 | 6.78 | 10.32 | 6.50 | 5.23 | 6.69 | 4.23 | 0.58 | 0.35 |
| 35 | Changtu     | 124.12 | 42.78 | 3.74 | 2.81  | 3.40 | 1.25 | 3.40 |      | 0.13 | 0.04 |
| 36 | Liaoyuan    | 125.08 | 42.92 | 4.52 | 3.44  | 2.99 | 2.90 | 2.81 | 0.67 | 0.11 | 0.43 |
| 37 | Meihekou    | 125.63 | 42.53 | 2.43 | 1.74  | 1.90 | 2.09 | 1.24 | 0.62 | 0.10 | 0.27 |
| 38 | Huadian     | 126.75 | 42.98 | 2.77 | 1.69  | 2.55 | 2.47 | 2.68 | 0.94 | 0.24 | 0.21 |
| 39 | Helong      | 129    | 42.53 | 3.21 | 3.87  | 5.00 | 7.43 | 3.19 | 7.26 | 0.76 | 0.59 |
| 40 | Xinmin      | 122.8  | 41.98 | 2.18 | 3.05  | 1.22 | 4.32 | 1.22 |      | 0.02 | 0.33 |
| 41 | Jinzhou     | 121.12 | 41.13 | 4.76 | 5.88  | 1.18 | 0.68 | 1.18 |      | 0.80 | 0.97 |
| 42 | Dengta      | 123.32 | 41.42 | 1.70 | 1.28  | 0.88 | 1.26 | 0.88 |      | 0.00 | 0.36 |
| 43 | Benxi       | 124.28 | 41.3  | 1.05 | 4.64  | 0.18 | 3.15 | 0.18 |      | 0.35 | 0.22 |
| 44 | Tonghuaxian | 125.75 | 41.66 | 1.63 | 1.38  | 0.59 | 2.43 | 0.41 | 2.80 | 0.02 | 0.11 |

|    |            |        |       |      |      |      |      |      |      |      |      |
|----|------------|--------|-------|------|------|------|------|------|------|------|------|
| 45 | Jian       | 126.15 | 41.1  | 1.98 | 2.75 | 1.94 | 2.09 | 2.24 | 2.01 | 0.41 | 0.18 |
| 46 | Huailai    | 115.5  | 40.4  | 5.92 | 5.23 | 3.74 | 3.79 | 3.74 |      | 0.01 | 0.04 |
| 47 | Jianchang  | 119.82 | 40.8  | 1.76 | 2.13 | 2.29 | 1.69 | 2.29 |      | 0.41 | 0.16 |
| 48 | Suizhong   | 120.35 | 40.35 | 2.02 |      | 0.97 | 0.69 | 0.97 |      | 0.21 |      |
| 49 | Xiuyan     | 123.28 | 40.28 | 2.62 | 2.33 | 2.25 | 4.51 | 2.25 |      | 0.01 | 0.00 |
| 50 | Kuandian   | 124.78 | 40.72 | 2.66 | 3.62 | 1.95 | 2.50 | 1.95 |      | 0.05 | 0.19 |
| 51 | Zhuozhou   | 115.96 | 39.48 | 2.97 | 2.48 | 2.41 | 1.43 | 2.41 |      | 0.64 | 0.80 |
| 52 | Rongcheng  | 115.85 | 39.05 | 1.31 | 1.54 | 1.03 | 0.78 | 1.23 | 1.21 | 0.61 | 0.13 |
| 53 | Bazhou     | 116.38 | 39.12 | 1.34 | 1.71 | 1.34 | 0.62 | 1.37 | 2.18 | 0.68 | 0.31 |
| 54 | Sanhe      | 117.08 | 39.96 | 2.12 | 2.28 | 1.48 | 0.38 | 1.48 |      | 0.28 | 0.38 |
| 55 | Tangshan   | 118.15 | 39.67 | 4.26 | 4.60 | 4.07 | 2.56 | 3.65 | 3.88 | 0.10 | 0.19 |
| 56 | Wafangdian | 121.75 | 39.73 | 1.57 |      | 1.04 | 2.19 | 1.04 |      | 0.20 |      |
| 57 | Hejian     | 116.08 | 38.45 | 2.90 | 3.61 | 2.60 | 2.18 | 2.60 |      | 0.54 | 0.23 |
| 58 | Huanghua   | 117.35 | 38.37 | 1.05 | 2.56 | 0.72 | 1.24 | 0.72 |      | 0.53 | 0.25 |
| 59 | Taian      | 117.15 | 36.16 | 1.44 | 2.92 | 1.19 | 1.86 | 0.80 | 0.84 | 0.15 | 0.40 |
| 60 | Hanting    | 119.18 | 36.75 | 0.60 | 2.93 | 0.20 | 5.94 | 0.20 |      | 0.35 | 0.47 |
| 61 | Gaomi      | 119.75 | 36.41 | 1.26 | 2.03 | 1.32 | 5.13 | 1.32 |      | 0.45 | 0.80 |
| 62 | Jiaozhou   | 120    | 36.3  | 1.07 | 1.32 | 0.76 | 0.91 | 0.72 | 1.06 | 0.52 | 0.34 |
| 63 | Puyang     | 115.01 | 35.7  | 1.23 | 1.22 | 1.10 | 2.30 | 1.34 | 1.08 | 0.29 | 0.14 |
| 64 | Heze       | 115.43 | 35.25 | 2.39 | 2.69 | 2.40 | 1.78 | 2.72 | 2.08 | 0.32 | 0.29 |
| 65 | Jining     | 116.58 | 35.45 | 1.03 | 3.26 | 0.88 | 2.02 | 0.74 | 1.29 | 0.44 | 0.00 |
| 66 | Pingwu     | 104.52 | 32.42 | 0.99 | 6.13 | 0.78 | 3.41 | 0.92 | 2.83 | 0.04 | 0.14 |
| 67 | Mingshan   | 103.13 | 30.1  | 0.98 | 1.39 | 0.07 | 4.73 | 0.07 |      | 0.31 | 0.19 |
| 68 | Hanyuan    | 102.68 | 29.35 | 2.57 | 2.98 |      |      |      |      |      |      |

|    |           |        |       |      |      |      |       |      |      |      |      |
|----|-----------|--------|-------|------|------|------|-------|------|------|------|------|
| 69 | Zhaojiao  | 102.85 | 28    | 3.27 | 3.75 | 2.93 | 1.43  | 3.04 | 2.59 | 0.38 | 0.03 |
| 70 | Nanxi     | 104.97 | 28.85 | 0.47 | 0.27 |      |       |      |      |      |      |
| 71 | Xuanwei   | 104.08 | 26.22 | 1.54 | 2.06 | 1.46 | 0.81  | 1.46 |      | 0.97 | 1.00 |
| 72 | Dali      | 100.18 | 25.7  | 6.57 | 8.57 |      |       |      |      | 0.64 | 0.66 |
| 73 | Kunming   | 102.68 | 25.02 | 4.37 | 5.67 | 3.84 | 10.50 | 3.84 |      | 0.17 | 0.02 |
| 74 | Wenshan   | 104.25 | 23.38 | 3.04 | 3.56 | 3.78 | 6.11  | 2.27 | 4.65 | 0.01 | 0.00 |
| 75 | Tianshui  | 105.75 | 34.58 | 3.92 |      | 5.66 | 5.56  |      |      | 0.50 |      |
| 76 | Dali      | 109.91 | 34.88 | 2.91 |      |      |       |      |      | 0.25 |      |
| 77 | Lintong   | 109.23 | 34.4  | 2.45 |      | 1.44 | 3.56  | 1.61 | 1.80 | 0.13 |      |
| 78 | Weinan    | 109.46 | 34.5  | 2.73 |      | 1.66 | 3.40  | 1.66 |      | 0.48 |      |
| 79 | Xianyang  | 108.71 | 34.4  | 0.63 |      | 0.51 | 0.57  | 0.51 |      | 0.28 |      |
| 80 | Ruicheng  | 110.71 | 34.7  | 1.18 | 2.67 | 0.90 | 1.45  | 0.90 |      | 0.98 | 0.41 |
| 81 | Qixian    | 114.78 | 34.53 | 1.35 | 1.67 | 1.76 | 2.24  | 2.05 | 0.40 | 0.15 | 0.19 |
| 82 | Chengxian | 105.71 | 33.75 | 3.56 |      |      |       |      |      |      |      |
| 83 | Shangzhou | 109.96 | 33.86 | 1.03 |      | 0.91 | 3.50  | 1.01 | 1.49 | 0.02 |      |
| 84 | Nanyang   | 112.58 | 33.03 | 2.07 | 1.33 | 2.80 | 2.76  | 2.80 |      | 0.01 | 0.13 |
| 85 | Bazhong   | 106.76 | 31.85 | 1.81 | 2.83 | 1.37 | 2.07  | 0.43 | 1.72 | 0.27 | 0.20 |
| 86 | Nanbu     | 106.05 | 31.33 | 1.06 | 0.39 |      |       |      |      |      |      |
| 87 | Yingshan  | 106.55 | 31.07 | 2.60 | 3.03 |      |       |      |      | 0.47 | 0.07 |
| 88 | Nanchon   | 106.08 | 30.8  | 3.19 | 4.44 |      |       |      |      | 0.47 | 0.07 |
| 89 | Guangan   | 106.63 | 30.47 | 1.44 | 1.22 | 0.81 | 0.95  | 0.81 |      | 0.00 | 0.00 |
| 90 | Shapingba | 106.48 | 29.52 | 0.40 | 1.28 |      |       |      |      | 0.25 | 0.95 |
| 91 | Yifeng    | 114.78 | 28.41 | 2.82 |      | 2.63 | 5.50  | 3.56 | 3.40 | 0.17 |      |
| 92 | Puding    | 105.75 | 26.31 | 0.91 | 1.72 |      |       |      |      | 0.16 | 0.10 |



|          |          |        |       |      |      |      |      |      |      |      |      |
|----------|----------|--------|-------|------|------|------|------|------|------|------|------|
| 93       | Shangqiu | 115.66 | 34.45 | 1.15 | 1.89 | 2.52 | 2.31 |      |      | 0.76 | 0.09 |
| 94       | Boxian   | 115.77 | 33.87 | 3.25 | 1.17 |      |      |      |      |      |      |
| 95       | Suining  | 118.06 | 33.88 | 0.91 | 1.56 | 0.73 | 1.24 | 0.87 | 0.93 | 0.47 | 0.14 |
| 96       | Qidong   | 121.66 | 31.8  | 1.34 |      | 1.11 | 0.75 | 1.36 | 0.26 | 0.13 |      |
| 97       | Wuyuan   | 117.98 | 29.35 | 5.25 |      | 2.53 | 3.24 |      |      | 0.42 |      |
| 98       | Douan    | 108.1  | 23.93 | 1.31 | 1.28 | 2.06 | 0.87 |      |      | 0.07 | 0.00 |
| 99       | Tiandeng | 107.15 | 23.08 | 1.88 | 1.22 | 2.83 | 2.76 | 1.88 | 1.36 | 0.14 | 0.27 |
| Average: |          |        |       | 2.39 | 3.17 | 1.99 | 2.80 | 1.84 | 2.14 | 0.30 | 0.28 |
